# Supplementary material for: Strengthening prevention and health promotion in and for old age
Source: Z Gerontol Geriatr. 2023 Dec 13;57(3):199–206. [Article in German] doi: 10.1007/s00391-023-02262-4 (PMC11078798; doi:10.1007/s00391-023-02262-4)
Supplement: Supplementary file 1 [file 391_2023_2262_MOESM1_ESM.pdf]

Appendix Tabelle 1. Themenfelder und Beispiele konkreter Handlungsempfehlungen

| Themenfeld                                                                                                                                                            | Beispiele konkreter Handlungsempfehlungen                                                                                                                                                                                                                                                                                                                                                                                                                             |
|-----------------------------------------------------------------------------------------------------------------------------------------------------------------------|-----------------------------------------------------------------------------------------------------------------------------------------------------------------------------------------------------------------------------------------------------------------------------------------------------------------------------------------------------------------------------------------------------------------------------------------------------------------------|
| Prävention und Gesundheitsförderung im und für das Alter stärken                                                                                                      | <ul style="list-style-type: none"> <li>• Hier können übergeordnete Empfehlungen eingeordnet werden</li> <li>• Edukative Ansätze für Prävention und Gesundheitsförderung an geragogischen Prinzipien (Prinzipien für Lernen im Alter) anlegen</li> <li>• Begleitungsansätze (gesundheitswissenschaftlich "Peer to Peer" Ansätze) zur Förderung von Gesundheitskompetenzen, zur Entscheidungshilfe, zur Nutzung von Angeboten als Ansatz stärken und fördern</li> </ul> |
| 1. Prävention und Gesundheitsförderung sind bis ins hohe Alter sinnvoll und möglich                                                                                   | <ul style="list-style-type: none"> <li>• Alters-Cut-Offs für Studien überdenken, sowie generell die Bedeutung des rein chronologischen Alters überdenken, da es oft wenig aussagekräftig ist</li> <li>• Angebote für das hohe Alter und an die Bedarfe (z.B. bezogen auf Zugang, Durchführung, Transfer) anpassen</li> </ul>                                                                                                                                          |
| 2. Prävention und Gesundheitsförderung für das Alter sollten früh beginnen                                                                                            | <ul style="list-style-type: none"> <li>• Gezielt strategische Konzepte entwickeln für frühzeitige auf das Alter gerichtete Prävention und Gesundheitsförderung - Altern als lebenslangen Prozess begreifen</li> <li>• Wirksame, sichere und erschwingliche Interventionen im jungen und mittleren Lebensalter entwickeln/verbessern (Ernährung, Sport, ...)</li> </ul>                                                                                                |
| 3. Prävention und Gesundheitsförderung müssen die Diversität und Heterogenität der Lebenslagen alter Menschen aufgreifen                                              | <ul style="list-style-type: none"> <li>• Die Reduktion von sozialer Ungleichheit mit als Endpunkt für Präventionsstudien verwenden</li> <li>• Konzepte zu Beratung und Aufklärung inhaltlich, sprachlich und bezogen auf die vielfältigen Bedarfe resultierend aus den Lebenslagen anpassen</li> </ul>                                                                                                                                                                |
| 4. Prävention und Gesundheitsförderung fördern und fordern Selbstbestimmung und Partizipation                                                                         | <ul style="list-style-type: none"> <li>• Empowerment und Gesundheitskompetenz neben klinischen Endpunkten in Studien erheben</li> <li>• Partizipative Forschung fördern</li> </ul>                                                                                                                                                                                                                                                                                    |
| 5. Prävention von Mehrfacherkrankungen gilt es stärker in den Blick zu nehmen                                                                                         | <ul style="list-style-type: none"> <li>• Mehrfacherkrankungen, funktionaler Status und gesundheitsbezogene Lebensqualität als wichtige Endpunkte anerkennen</li> <li>• Interventionen zur Prävention auf Multimorbidität statt ausschließlich auf Einzelerkrankungen ausrichten und fördern</li> </ul>                                                                                                                                                                |
| 6. Prävention von Pflegebedürftigkeit und Prävention in der Pflege sind gleichrangig zu behandeln                                                                     | <ul style="list-style-type: none"> <li>• Aufwertung nicht-pharmakologischer gegenüber pharmakologischen Interventionen, individuell passgenaue Förderung sinnvoller ernährungs- und bewegungsassoziierter Aktivitäten als "dauerhaft notwendiges Medikament ohne Zuzahlung"</li> </ul>                                                                                                                                                                                |
| 7. Prävention und Gesundheitsförderung müssen lebensweltlich und sektorenübergreifend gedacht werden, dabei sind vor allem Aspekte der sozialen Ungleichheit und eine | <ul style="list-style-type: none"> <li>• Kommunale Gestaltungsmöglichkeiten des Präventionsgesetzes unterstützen und ausschöpfen: Sektorenübergreifende Zusammenarbeit von Akteur:innen wie „stationäre und ambulante Versorgung“, „Pflege“, „Rehabilitation“, „Prävention und Gesundheitsförderung“ sowie „Stadtentwicklung“, „Energie“, „Verkehrsplanung“ und „Digitalisierung“.</li> </ul>                                                                         |

|                                                                                                                                                  |                                                                                                                                                                                                                                                                                                                                                                                                                                                                                                                                                                                                                                                                                                                        |
|--------------------------------------------------------------------------------------------------------------------------------------------------|------------------------------------------------------------------------------------------------------------------------------------------------------------------------------------------------------------------------------------------------------------------------------------------------------------------------------------------------------------------------------------------------------------------------------------------------------------------------------------------------------------------------------------------------------------------------------------------------------------------------------------------------------------------------------------------------------------------------|
| <p>Ressourcenorientierung mit zu beachten</p>                                                                                                    | <ul style="list-style-type: none"> <li>• Gesundheitsförderung in den Lebenswelten älterer, alter und hochaltriger Menschen stärken und in die Lebenswelten integrieren</li> <li>• Benennen und Auswählen, welche Lebenswelten hier einbezogen werden müssen und Veränderungen in den Lebenswelten in den Ansätzen mitdenken und Kontinuität bei Veränderungen gewährleisten</li> <li>• Stärkung ressourcen- statt defizitorientierter Ansätze der Gesundheitsförderung</li> </ul>                                                                                                                                                                                                                                      |
| <p>8. Prävention und Gesundheitsförderung und die Forschung dazu sind inter- und transdisziplinär und auf unterschiedlichen Ebenen anzulegen</p> | <ul style="list-style-type: none"> <li>• DFG: Eigenes Fach für Gerontologie und Alternsforschung einführen</li> <li>• BMBF: Förderprogramme zum Thema Prävention und Gesundheitsförderung im Alter</li> <li>• Helmholtz-Zentrum: stärker interdisziplinär und auf Prävention ausrichten</li> <li>• G-BA Innovationsfonds: Ausschreibungen mit Themenschwerpunkt zu neuen Versorgungsformen und Versorgungsforschung im Bereich Prävention im und für das Alter</li> <li>• Insgesamt die Ausrichtung auf Prävention im und für das höhere Lebensalter sowie auf die Kriterien Inter- und Transdisziplinarität in der Gesundheitsforschung bei der Mittelvergabe/ der Zuwendung von Forschungsgeldern stärken</li> </ul> |
